# Supplementary material for: Candidate genes and pathways downstream of PAX8 involved in ovarian high-grade serous carcinoma
Source: PubMed Central journal article supplement (PMC5173106; doi:10.18632/oncotarget.9740), 2016-05-31
Supplement: oncotarget-07-41929-s001.pdf [file oncotarget-07-41929-s001.pdf]

## Candidate genes and pathways downstream of PAX8 involved in ovarian high-grade serous carcinoma

### Supplementary Materials

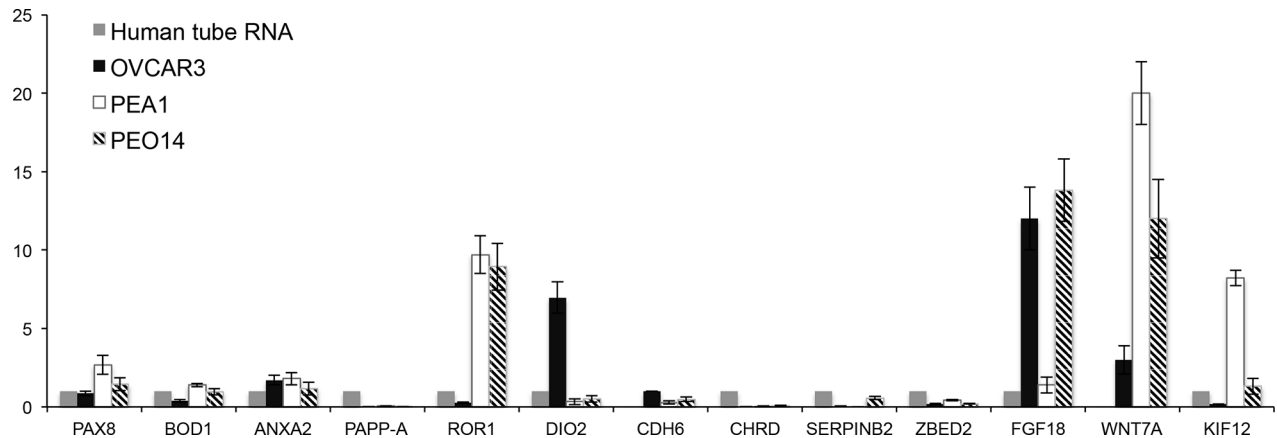

**Supplementary Figure S1: Expression levels of 13 genes measured on total RNA prepared from human Fallopian tubes, OVCAR3, PEA1 and PE014 cells.** The values are means  $\pm$  SD of three independent experiments in duplicate, normalized by the expression of IP08 and expressed as fold change with respect to human Fallopian tubes.

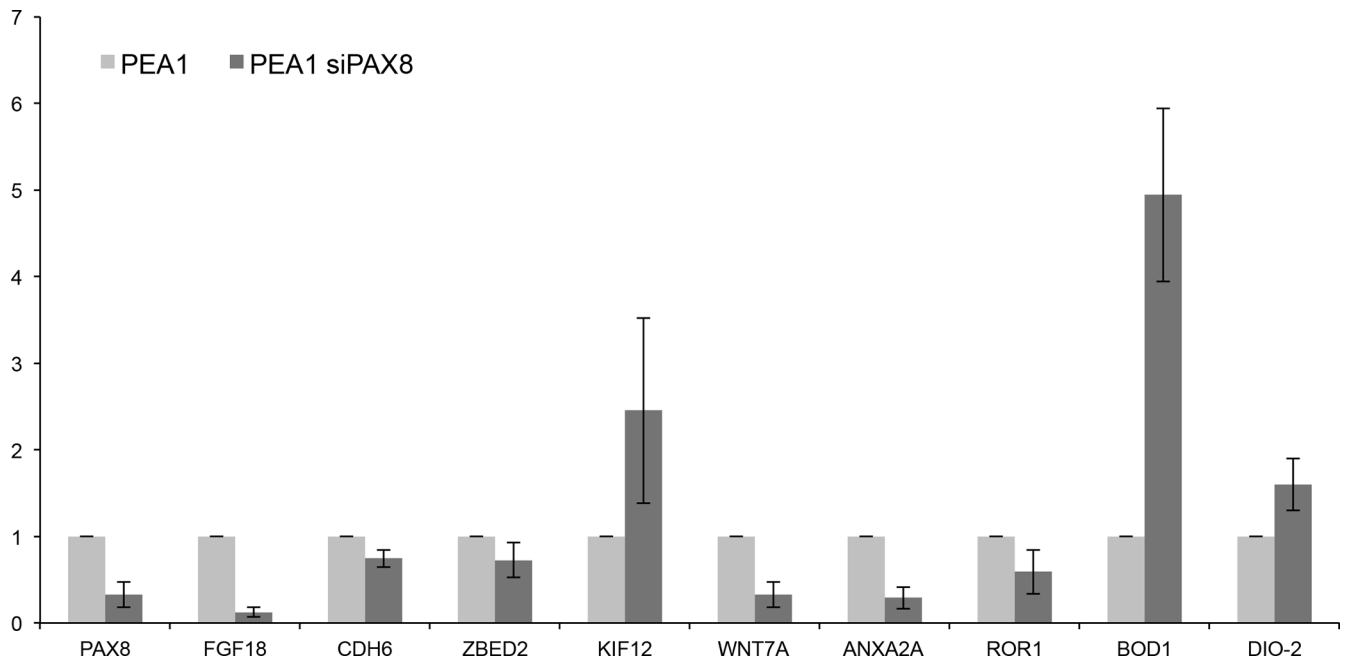

**Supplementary Figure S2: Expression levels of some representative genes measured on total RNA prepared from PEA1 cells 24 h after transient transfection with PAX8 siRNA or scramble siRNA.** The values are means  $\pm$  SD of three independent experiments in duplicate, normalized by the expression of IP08 and expressed as fold change with respect to the cells transfected with the scramble siRNA, whose value was set at 1.0.

**Supplementary Table S1: Genes expressed in SKOV-3 (FPKM1) and FT194 cells (FPKM2)**

**Supplementary Table S2: Genes expressed in SKOV-3 (FPKM1) and FT194 cells (FPKM2) at significant level (FDR-adjusted  $p$ -value  $\leq 0.05$ )**

**Supplementary Table S3: Genes modulated following PAX8 silencing**

**Supplementary Table S4: Genes modulated following PAX8 knock-down in FT194 cells**

**Supplementary Table S5: PASTAA analysis of PAX8 putative target genes**

| Gene ID         | Alternate Gene Synonym | Affinity Score |
|-----------------|------------------------|----------------|
| ENSG00000099284 | H2AFY2                 | 2,345          |
| ENSG00000020922 | MRE11A                 | 2,28           |
| ENSG00000049130 | KITLG                  | 2,144          |
| ENSG00000125257 | ABCC4                  | 2,135          |
| ENSG00000197746 | PSAP                   | 1,952          |
| ENSG00000131504 | DIAPH1                 | 1,833          |
| ENSG00000124212 | PTGIS                  | 1,788          |
| ENSG00000156427 | FGF18                  | 1,785          |
| ENSG00000174307 | PHLDA3                 | 1,744          |
| ENSG00000172005 | MAL                    | 1,734          |
| ENSG00000166619 | BLCAP                  | 1,714          |
| ENSG00000001561 | ENPP4                  | 1,668          |
| ENSG00000125618 | PAX8                   | 1,603          |
| ENSG00000136628 | EPRS                   | 1,593          |
| ENSG00000006576 | PHTF2                  | 1,592          |
| ENSG00000102241 | HTATSF1                | 1,582          |
| ENSG00000182718 | ANXA2                  | 1,562          |
| ENSG00000162104 | ADCY9                  | 1,543          |
| ENSG00000163002 | NUP35                  | 1,511          |
| ENSG00000111328 | CDK2AP1                | 1,497          |
| ENSG00000131941 | RHPN2                  | 1,495          |

|                 |        |       |
|-----------------|--------|-------|
| ENSG00000185483 | ROR1   | 1,487 |
| ENSG00000085662 | AKR1B1 | 1,473 |
| ENSG00000147676 | MAL2   | 1,464 |
| ENSG00000113361 | CDH6   | 1,461 |
| ENSG00000162407 | PPAP2B | 1,451 |
| ENSG00000185621 | LMLN   | 1,421 |
| ENSG00000144048 | DUSP11 | 1,418 |
| ENSG00000185339 | TCN2   | 1,377 |
| ENSG00000112218 | GPR63  | 1,374 |
| ENSG00000166747 | AP1G1  | 1,288 |
| ENSG00000197594 | ENPP1  | 1,277 |
| ENSG00000152291 | TGOLN2 | 1,236 |

**Supplementary Table S6: Primers used in qRT-PCR**

| GENE NAME       | FORWARD PRIMER 5'-3'   | REVERSE PRIMER 5'-3'   |
|-----------------|------------------------|------------------------|
| <b>BOD1</b>     | GCTTACCAAAACCTGAGGCA   | CCTGTCTACTCCAGCTTCCA   |
| <b>DIO2</b>     | CCCCAAGTTGCTTTGCTCAA   | AGCAAGTCTACGCTGAGGAT   |
| <b>PTGS2</b>    | TCCCTTCCTTCGAAATGCAA   | TCATCAGGCACAGGAGGAAG   |
| <b>SERPINB2</b> | AACCCCAGGCAGTAGACTTC   | TCCCCATCTACAGAACCTTCAG |
| <b>FGF18</b>    | GGGCAAGGAGACGGAATTCT   | AACCTTCTCGATGAACACACAC |
| <b>WNT7A</b>    | CAATGGCCGCTGGAAGTCTG   | GCAATGATGGCGTAGGTGAA   |
| <b>KIF 12</b>   | GCTTCTATGTGGAGCAGCTG   | ACGGCTGATGTAAAGGGTGA   |
| <b>CDH6</b>     | ACAGTATTCTACAGGGACAGCC | CACTTGGTACTGCTCCCTGT   |
| <b>ZBED2</b>    | GACGAGGAAGAGGAGGGAAC   | CTTGTTGTGGGGCATTGGAG   |
| <b>CHRD</b>     | CAGGAGTGGGGACTAACC     | CAGCACCTCAGCAAAGCCT    |
| <b>ANXA2</b>    | GTTCACGAAATCCTGTGCAA   | TGGTCTTGATGGCTGTTTCA   |
| <b>PAX8</b>     | CCCTTCCAACACGCCACT     | CTGCTTTATGGCGAAGGGTG   |
| <b>IPO8</b>     | AATCCCAGTACGACAGGCAG   | TCACGTATTTGCTGGCGATC   |
